# Supplementary material
Source: PubMed Central journal article supplement (PMC4019159)
Supplement: IAI.00077-14_zii999090657so1.pdf [file IAI.00077-14_zii999090657so1.pdf]

## Supplementary material

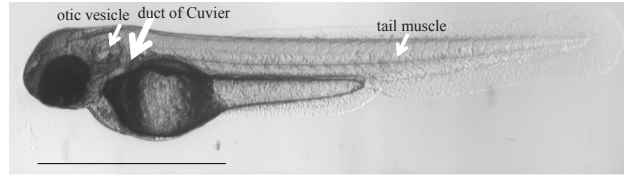

**FIG S1** Zebrafish embryo 48-52 hours post fertilization. Otic vesicle, duct of Cuvier and tail muscle is marked with arrows. Scale bar: 1 mm.

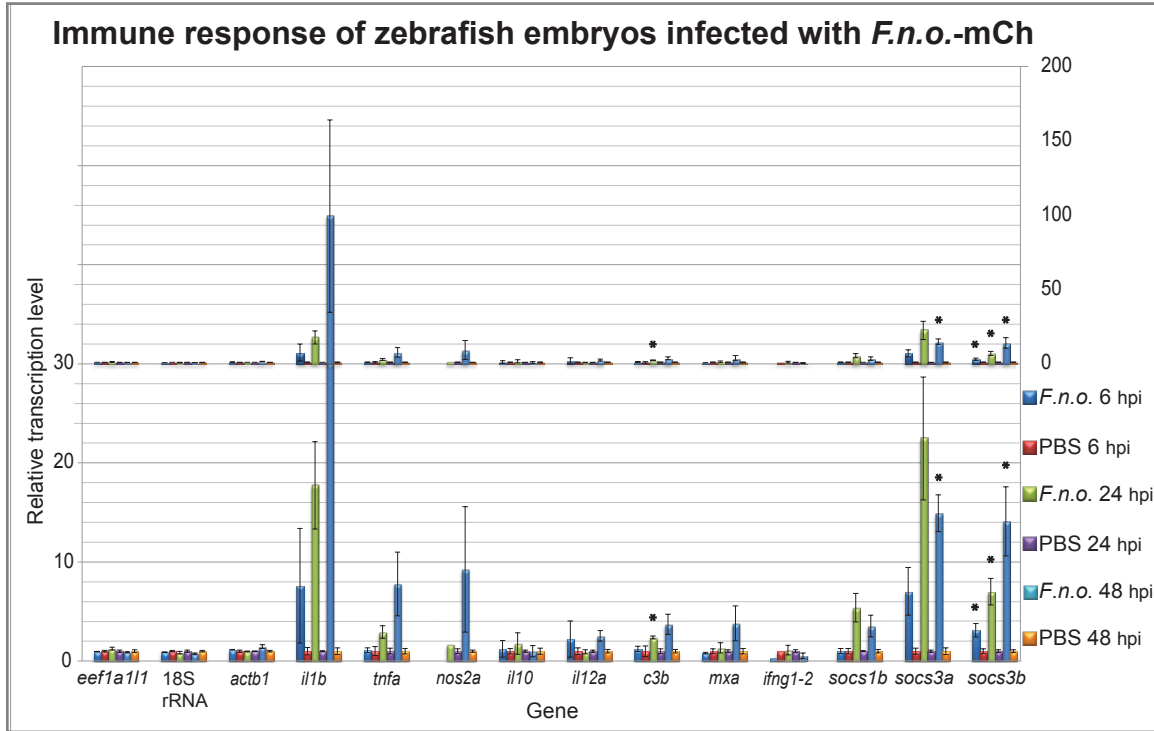

**FIG S2** Immune response of zebrafish embryos infected with *F.n.o.*-mCh at different time points. Asterisks indicate statistically significant difference with  $p < 0.05$ .

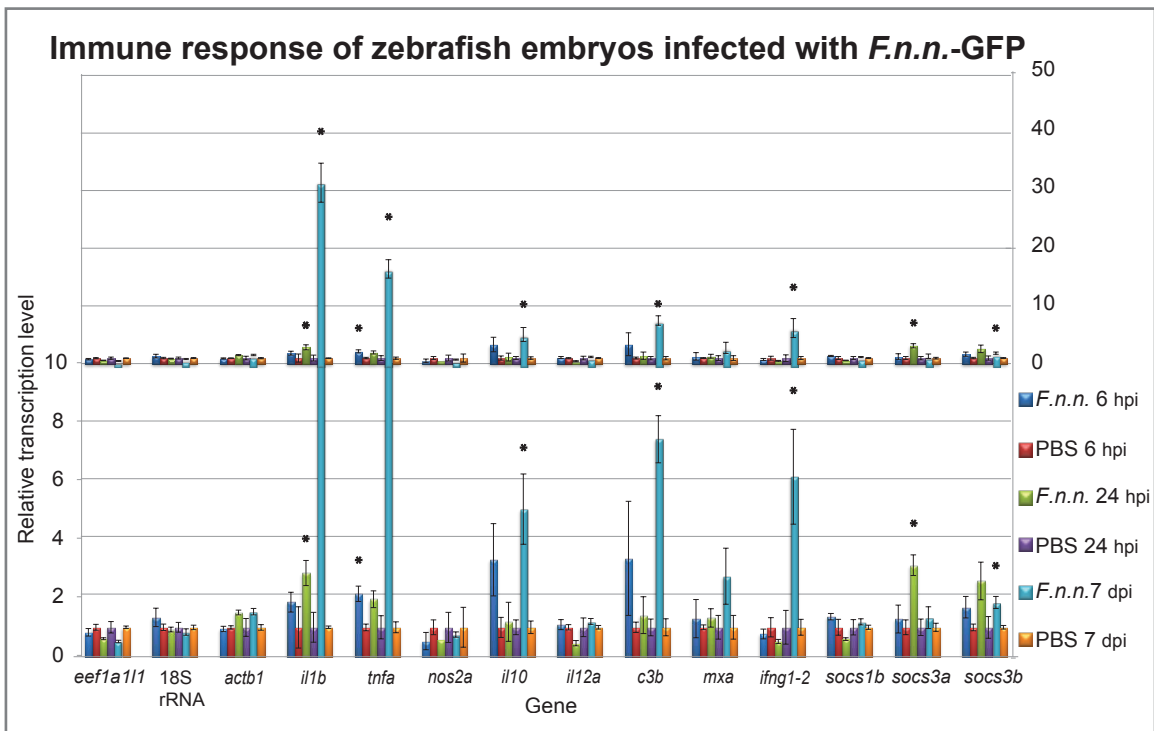

**FIG S3** Immune response of zebrafish embryos infected with *F.n.n.*-GFP at different time points. Asterisks indicate statistically significant difference with  $p < 0.05$ .

## Immune response of zebrafish embryos infected with *F.t.n.*-GFP

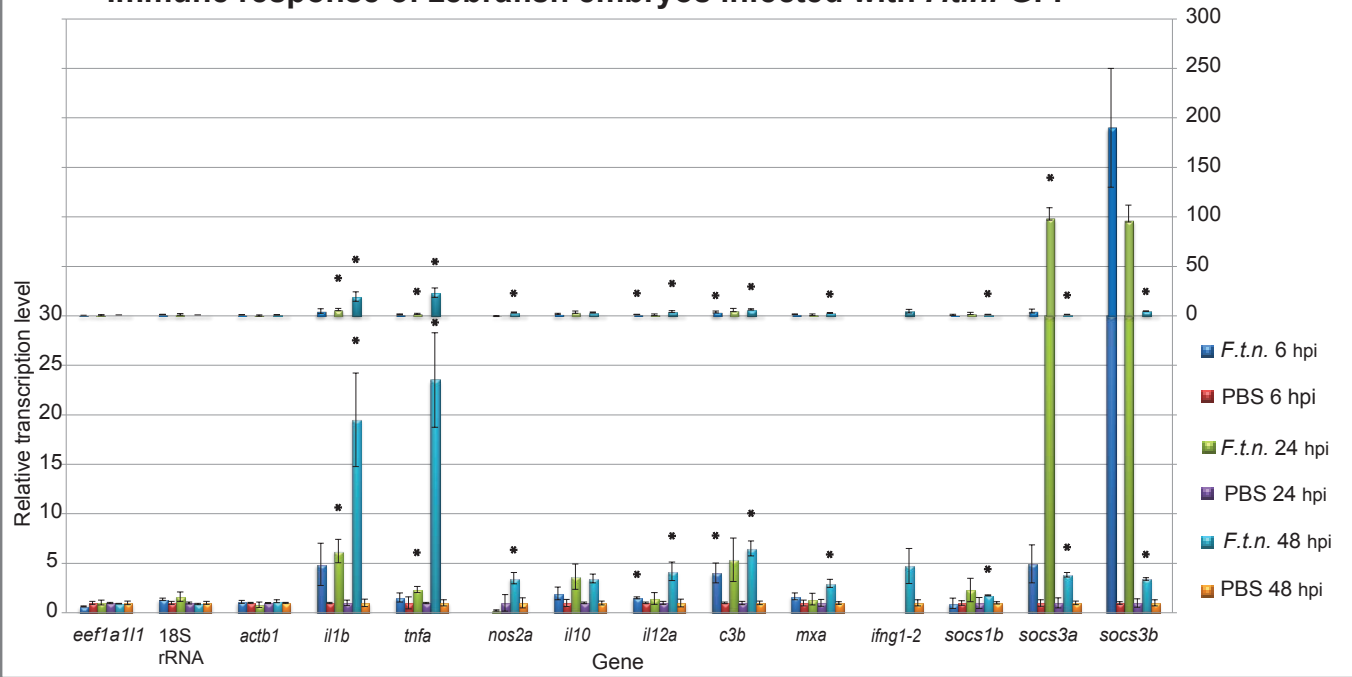

**FIG S4** Immune response of zebrafish embryos infected with *F.t.n.*-GFP at different time points. Asterisks indicate statistically significant difference with  $p < 0.05$ .

**TABLE S1** Bacterial strains used in the experiments.

| Strain name                                                                                                                                                                                                                                                                                                              | Plasmid                  | Reference                                       |
|--------------------------------------------------------------------------------------------------------------------------------------------------------------------------------------------------------------------------------------------------------------------------------------------------------------------------|--------------------------|-------------------------------------------------|
| <i>F. noatunensis</i> ssp. <i>noatunensis</i> NCIMB14265                                                                                                                                                                                                                                                                 | -                        | [1]                                             |
| HWL108 ( <i>F. noatunensis</i> ssp. <i>noatunensis</i> NCIMB14265)                                                                                                                                                                                                                                                       | pKK289Km/ <i>gfp</i>     | [2]                                             |
| <i>F. noatunensis</i> ssp. <i>noatunensis</i> NCIMB14265                                                                                                                                                                                                                                                                 | pKK289Km/ <i>mCherry</i> | This study                                      |
| <i>F. noatunensis</i> ssp. <i>orientalis</i> LADL 07-285A                                                                                                                                                                                                                                                                | -                        | [3]                                             |
| <i>F. noatunensis</i> ssp. <i>orientalis</i> LADL 07-285A                                                                                                                                                                                                                                                                | pKK289Km/ <i>mCherry</i> | This study                                      |
| <i>F. tularensis</i> ssp. <i>novicida</i> U112 wt                                                                                                                                                                                                                                                                        | -                        | [4]                                             |
| <i>F. tularensis</i> ssp. <i>novicida</i> U112 wt                                                                                                                                                                                                                                                                        | pKK289Km/ <i>gfp</i>     | This study                                      |
| <i>F. tularensis</i> ssp. <i>novicida</i> U112 wt                                                                                                                                                                                                                                                                        | pKK289Km/ <i>mCherry</i> | This study                                      |
| <i>E. coli</i> DH5 $\alpha$ ( <i>F</i> - $\Phi$ 80 <i>lacZ</i> $\Delta$ M15 $\Delta$ ( <i>lacZYA-argF</i> ) U169 <i>recA1</i> <i>endA1</i> <i>hsdR17</i> ( <i>rK</i> <sup>-</sup> , <i>mK</i> <sup>+</sup> ) <i>phoA</i> <i>supE44</i> $\lambda$ - <i>thi-1</i> <i>gyrA96</i> <i>relA1</i> )                             | pmCherry                 | Clontech Laboratories Inc. Cat no. 632522       |
| <i>E. coli</i> OneShot <sup>®</sup> Top10 ( <i>F</i> - <i>mcrA</i> $\Delta$ ( <i>mrr-hsdRMS-mcrBC</i> ) $\phi$ 80 <i>lacZ</i> $\Delta$ M15 $\Delta$ <i>lacX74</i> <i>recA1</i> <i>araD139</i> $\Delta$ ( <i>ara-leu</i> ) 7697 <i>galU</i> <i>galK</i> <i>rpsL</i> ( <i>StrR</i> ) <i>endA1</i> <i>nupG</i> $\lambda$ -) | pCR4-TOPO                | Life Technologies Corporation Cat no. K4575-J10 |
| <i>E. coli</i> OneShot <sup>®</sup> Top10 ( <i>F</i> - <i>mcrA</i> $\Delta$ ( <i>mrr-hsdRMS-mcrBC</i> ) $\phi$ 80 <i>lacZ</i> $\Delta$ M15 $\Delta$ <i>lacX74</i> <i>recA1</i> <i>araD139</i> $\Delta$ ( <i>ara-leu</i> ) 7697 <i>galU</i> <i>galK</i> <i>rpsL</i> ( <i>StrR</i> ) <i>endA1</i> <i>nupG</i> $\lambda$ -) | pCR4/ <i>mCherry</i>     | This study                                      |
| <i>E. coli</i> DH5 $\alpha$ ( <i>F</i> - $\Phi$ 80 <i>lacZ</i> $\Delta$ M15 $\Delta$ ( <i>lacZYA-argF</i> ) U169 <i>recA1</i> <i>endA1</i> <i>hsdR17</i> ( <i>rK</i> <sup>-</sup> , <i>mK</i> <sup>+</sup> ) <i>phoA</i> <i>supE44</i> $\lambda$ - <i>thi-1</i> <i>gyrA96</i> <i>relA1</i> )                             | pKK289Km/ <i>mCherry</i> | This study                                      |
| <i>E. coli</i> S17-1 ( <i>recA</i> <i>pro</i> <i>hsdR</i> <i>RP4-2-Tc::Mu-Km::Tn7</i> integrated into the chromosome)                                                                                                                                                                                                    | pKK289Km/ <i>gfp</i>     | [5]                                             |

**TABLE S2** Primers used for RT-qPCR in the experimnts. Asterisks indicate NCBI Gene ID for the genes without an official NCBI Ref. Seq. for mRNA transcripts.

| Gene name                                                         | Gene symbol             | Forward primer                           | Reverse primer                    | Product size | Accession number | Reference               |
|-------------------------------------------------------------------|-------------------------|------------------------------------------|-----------------------------------|--------------|------------------|-------------------------|
| <i>interferon, gamma 1-2</i>                                      | <i>ifng1-2</i>          | QuantiTect Primer Assay Dr_ifng1-2_1_SG  |                                   | 89 bp        | NM_212864.1      | QIAGEN Cat # QT02064328 |
| <i>myxovirus (influenza) resistance A</i>                         | <i>mxa</i>              | QuantiTect Primer Assay Dr_mxa_1_SG      |                                   | 94 bp        | NM_182942.4      | QIAGEN Cat # QT02179205 |
| <i>interleukin 1, beta</i>                                        | <i>il1b</i>             | TTC CCC AAG TGC TGC TTA TT               | AAG TTA AAA CCG CTG TGG TCA       | 149 bp       | NM_212844.2      | [6]                     |
| <i>interleukin 10</i>                                             | <i>il10</i>             | QuantiTect Primer Assay Dr_il10_1_SG     |                                   | 144 bp       | NM_001020785.2   | QIAGEN Cat # QT02063922 |
| <i>interleukin 12a</i>                                            | <i>il12a</i>            | QuantiTect Primer Assay Dr_il12a_1_SG    |                                   | 94 bp        | NM_001007107.1   | QIAGEN Cat # QT02085300 |
| <i>nitric oxide synthase 2a, inducible</i>                        | <i>nos2a</i>            | QuantiTect Primer Assay Dr_inos2a_1_SG   |                                   | 105 bp       | NM_001104937.1   | QIAGEN Cat # QT02091705 |
| <i>complement component c3b</i>                                   | <i>c3b</i>              | QuantiTect Primer Assay Dr_c3b_1_SG      |                                   | 85 bp        | NM_131243.1      | QIAGEN Cat # QT02059771 |
| <i>tumor necrosis factor a</i>                                    | <i>tnfa</i>             | ACC AGG CCT TTT CTT CAG GT               | GCA TGG CTC ATA AGC ACT TGT T     | 148 bp       | NM_212859.2      | [6]                     |
| <i>18S rRNA</i>                                                   | <i>zgc:158463</i>       | GCC TGC GGC TTA ATT TGA CT               | ACC ACC CAC AGA ATC GAG AAA       | 98 bp        | NM_001098396.1   | [6]                     |
| <i>actin, beta 1</i>                                              | <i>actb1</i>            | QuantiTect Primer Assay Dr_bactin_1_1_SG |                                   | 142 bp       | NM_131031.1      | QIAGEN Cat # QT02174907 |
| <i>eukaryotic translation elongation factor 1 alpha 1, like 1</i> | <i>ee1a1l1</i>          | CTT CTC AGG CTG ACT GTG C                | CCG CTA GCA TTA CCC TCC           | 358 bp       | NM_131263.1      | [7]                     |
| <i>F. noatunensis Francisella outer membrane protein A</i>        | <i>fopA</i>             | TAC TGG TGC ATG GGA TGT TG               | TCT TGG AGC CAT TGT CTG AA        | 100 bp       | 12952182*        | [8]                     |
| <i>F. noatunensis DNA topoisomerase II</i>                        | <i>gyrA</i>             | CGA GCT TTA CGA GCT GCT TC               | TCT TTT AGA GAA CCC TAA AGA GGC T | 87 bp        | 12952071*        | [9]                     |
| <i>mCherry</i>                                                    | <i>mCherry</i>          | TAC ACA TAT GGT GAG CAA GGG CGA GG       | CAC CAG ACA AGT TGG TAA TGG       | 778 bp       |                  | This study              |
| <i>F. novicida Francisella outer membrane protein A</i>           | <i>F. novicida fopA</i> | GGC AGA GCG GGT ACT AAC AT               | GTT TGA GCA GCT GTA GTC GC        | 119 bp       | 4548250*         | This study              |
| <i>suppressor of cytokine signaling 1b</i>                        | <i>socs1b</i>           | QuantiTect Primer Assay Dr_soc1_1_SG     |                                   | 65 bp        | NM_001003467.1   | QIAGEN Cat # QT02168187 |
| <i>suppressor of cytokine signaling 3a</i>                        | <i>socs3a</i>           | QuantiTect Primer Assay Dr_soc3a_1_SG    |                                   | 97 bp        | NM_199950.1      | QIAGEN Cat # QT02056488 |
| <i>suppressor of cytokine signaling 3b</i>                        | <i>socs3b</i>           | QuantiTect Primer Assay Dr_soc3b_1_SG    |                                   | 123 bp       | NM_213304.1      | QIAGEN Cat # QT02068724 |

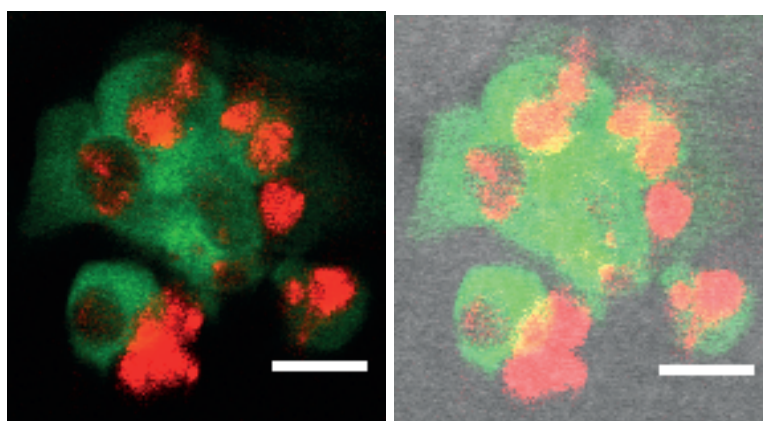

**FIG S5** Neutrophils of Tg(*mpx:EGFP*)/*i114* zebrafish embryos phagocytized *E.coli*-mCh injected via intramuscular route. Scale bar 10  $\mu$ m.

#### REFERENCES

- Olsen AB, Mikalsen J, Rode M, Alfjorden A, Hoel E, Straum-Lie K, Haldorsen R, Colquhoun DJ. 2006. A novel systemic granulomatous inflammatory disease in farmed Atlantic cod, *Gadus morhua* L., associated with a bacterium belonging to the genus *Francisella*. *J. Fish. Dis.* **29**:307-311.
- Bakkemo KR, Mikkelsen H, Bordevik M, Torgersen J, Winther-Larsen HC, Vanberg C, Olsen R, Johansen LH, Seppola M. 2011. Intracellular localisation and innate immune responses following *Francisella noatunensis* infection of Atlantic cod (*Gadus morhua*) macrophages. *Fish Shellfish Immunol.* **31**:993-1004.
- Soto E, Fernandez D, Hawke JP. 2009. Attenuation of the fish pathogen *Francisella* sp. by mutation of the *iglC\** gene. *J. Aquat. Anim. Health* **21**:140-149.
- Larson CL, Wicht W, Jellison WL. 1955. A New Organism Resembling *P. tularensis* Isolated From Water. *Public Health Reports* **70**:253-258.
- Bönquist L, Lindgren H, Golovliov I, Guina T, Sjöstedt A. 2008. MglA and Igl proteins contribute to the modulation of *Francisella tularensis* live vaccine strain-containing phagosomes in murine macrophages. *Infect. Immun.* **76**:3502-3510.
- Dios S, Romero A, Chamorro R, Figueras A, Novoa B. 2010. Effect of the temperature during antiviral immune response ontogeny in teleosts. *Fish. Shellfish. Immunol.* **29**:1019-1027.
- Chen J, Ruan H, Ng SM, Gao C, Soo HM, Wu W, Zhang Z, Wen Z, Lane DP, Peng J. 2005. Loss of function of *def* selectively up-regulates *Delta113p53* expression to arrest expansion growth of digestive organs in zebrafish. *Genes Dev.* **19**:2900-2911.
- Ottem KF, Nylund A, Isaksen TE, Karlsbakk E, Bergh Ø. 2008. Occurrence of *Francisella piscicida* in farmed and wild Atlantic cod, *Gadus morhua* L., in Norway. *J. Fish. Dis.* **31**:525-534.
- Brudal E, Winther-Larsen HC, Colquhoun DJ, Duodu S. 2013. Evaluation of reference genes for reverse transcription quantitative PCR analyses of fish-pathogenic *Francisella* strains exposed to different growth conditions. *BMC. Res. Notes* **6**:76. doi: 10.1186/1756-0500-6-76
